# Supplementary material
Source: PubMed Central journal article supplement (PMC4373287)
Supplement: supp_mcv005_aob-14498-s01.pdf [file supp_mcv005_aob-14498-s01.pdf]

## SUPPLEMENTARY DATA

**Figure S1.** *Myrcia s.l.* species from sect. *Aulomyrcia*: verticillate leaf arrangement in *Myrcia tetraphylla* (I); terminal inflorescence of *Myrcia amazonica* (II) and Staggemeier 799 (III); detail of free sepals on calyx of *Myrcia multiflora* mature fruit (IV); extended hypanthium in buds of *Myrcia racemosa* (V); free calyx lobes in fruits of *Myrcia racemosa* (VI), Staggemeier 792 (VII), and *Myrcia amazonica* (VIII); closed buds protected by bracteoles in *Marlierea neuweideana* (IX); irregularly splitting calyx lobes in mature fruits of *Marlierea neuweideana* (X); regularly splitting calyx lobes in immature fruit of *Marlierea sucrei* (XI); irregularly splitting calyx lobes in immature fruits of Staggemeier 764 (XII); inflorescence axes emerging from a single terminal whorl in *Marlierea tomentosa* during development (XIII); anthesis showing irregularly branched primary axes in *Marlierea tomentosa* (XIV); detail of closed bud and anthesis in *Marlierea tomentosa* (XV); old flowers showing irregular splitting of calyx in *Marlierea excoriata* (XVI).

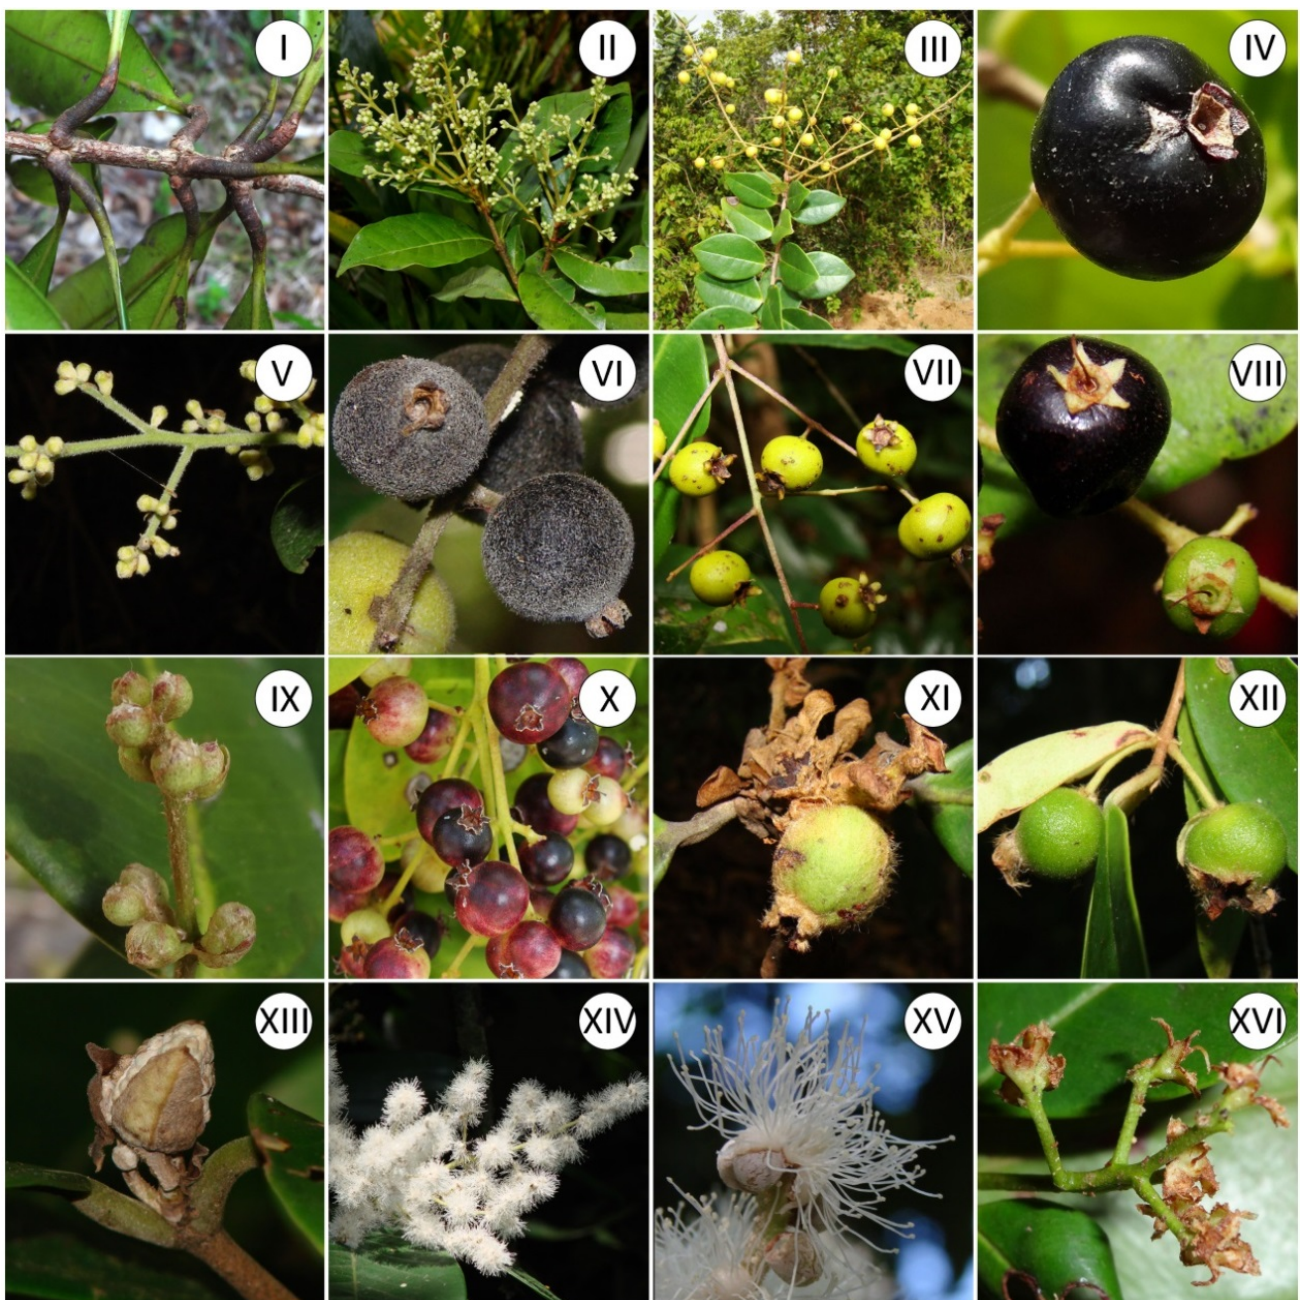

**Figure S2.** Phylogenetic hypothesis for *Myrcia* clade nine, consensus tree and branch lengths generated from maximum likelihood inference based on DNA combined dataset of nuclear and plastid regions (ITS, *psbA-trnH*, *trnL-F*, *trnQ-rpS16*, *ndhF*). Clades from Lucas *et al.* (2011) on bars and the colours of branches inside clade nine represent subclades (thinner vertical bars). Values near to branches are bootstrap percentages shown when above 50%.

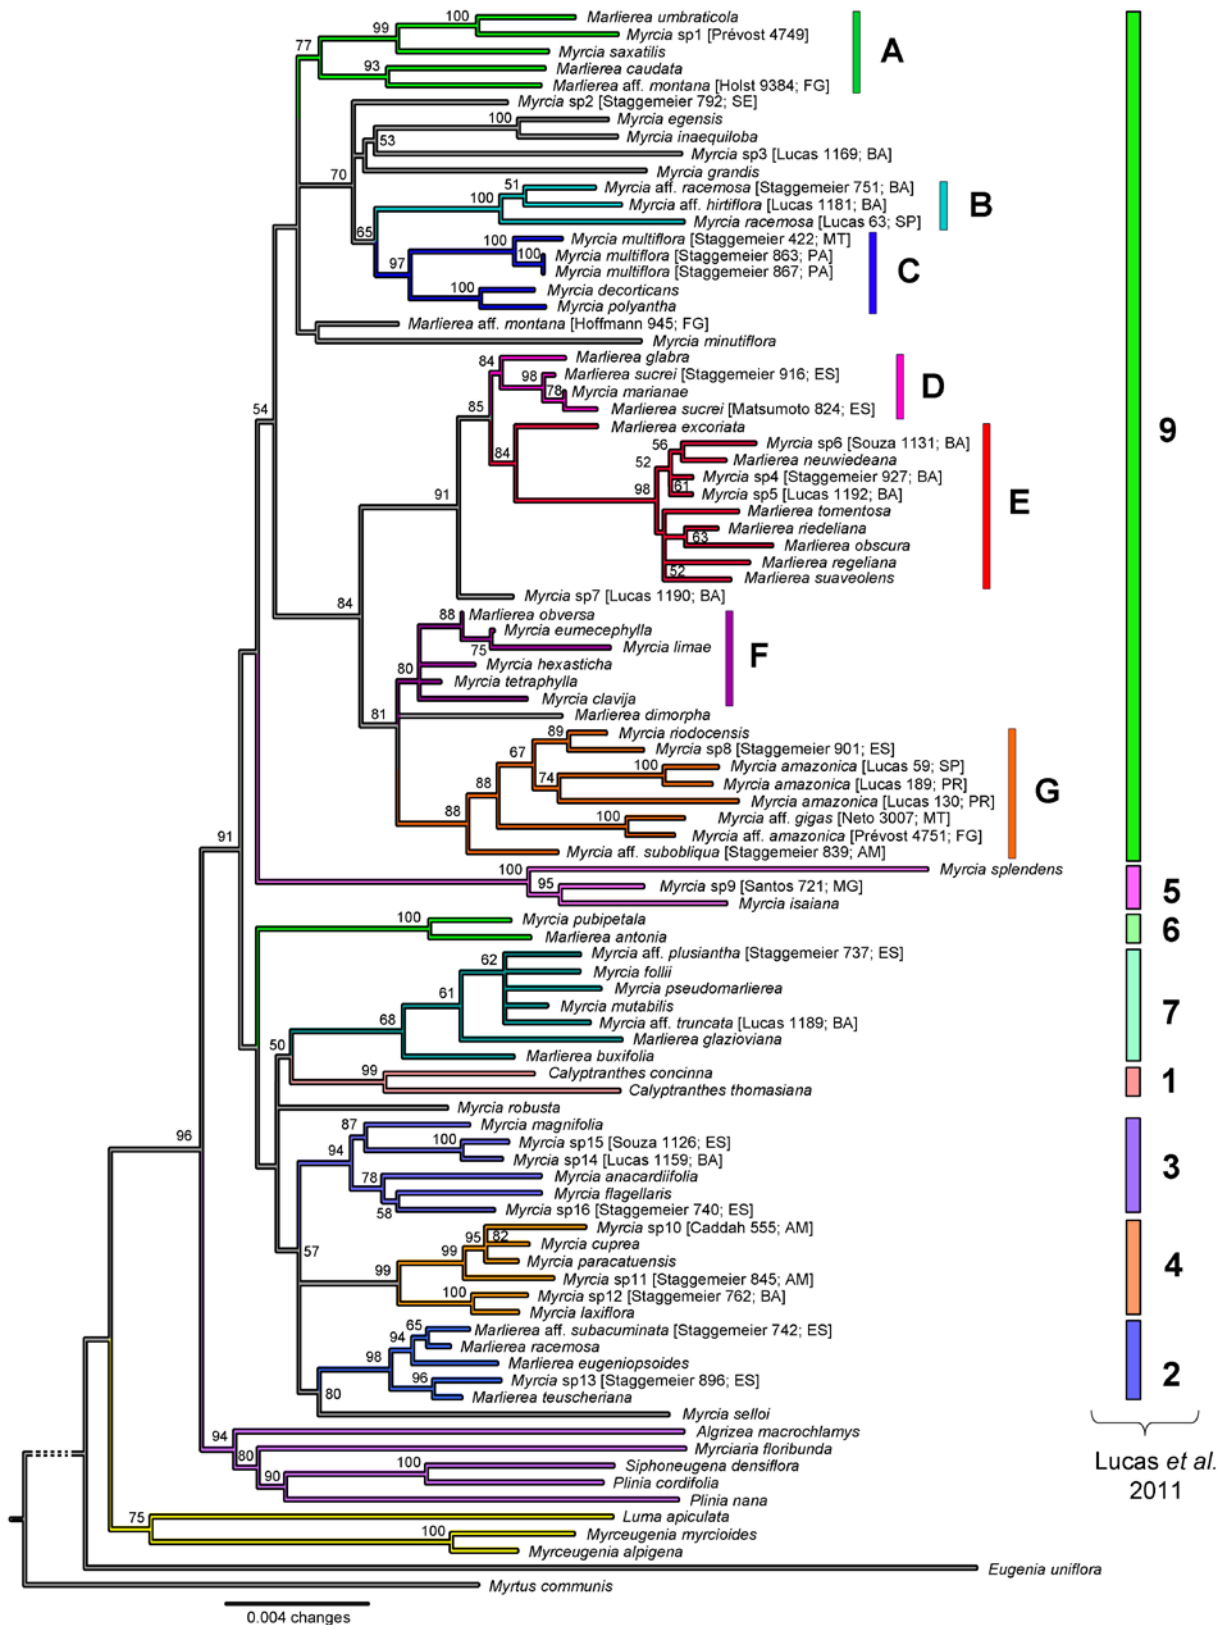

**Table S1.** Primers used for PCR

| Molecular marker                        | Primer name | DNA sequence (5' - 3')        | Reference                       |
|-----------------------------------------|-------------|-------------------------------|---------------------------------|
| <i>trnQ</i> -5' rpS16 intergenic spacer | trnQ(UUG)   | GCGTGGCCAAGYGGTAAGGC          | Shaw <i>et al.</i> (2007)       |
|                                         | MYtrnQR     | AGTTGATGTAAAGGAAGATTTAGACTC   | Murillo-A. <i>et al.</i> (2012) |
|                                         | MYrps16F    | GCGTAAAAGWAGGAAATGCTTAATG     | Murillo-A. <i>et al.</i> (2012) |
|                                         | rpS16x1     | GTTGCTTTYTACCACATCGTTT        | Shaw <i>et al.</i> (2007)       |
| ITS                                     | AB101       | ACGAATTCATGGTCCGGTGAAGTGTTTCG | Sun <i>et al.</i> (1994)        |
|                                         | AB102       | GAATTCCTCCGGTTCGCTCGCCGTTAC   | Sun <i>et al.</i> (1994)        |
|                                         | ITS-5       | GGAAGTAAAAGTCGTAACAAGG        | White <i>et al.</i> (1990)      |
|                                         | ITS-2       | GCTGCGTTCTTCATCGATGC          | White <i>et al.</i> (1990)      |
|                                         | ITS-3       | GCATCGATGAAGAACGCAGC          | White <i>et al.</i> (1990)      |
|                                         | ITS-4       | TCCTCCGCTTATTGATATGC          | White <i>et al.</i> (1990)      |
| <i>psbA</i> (F) <i>trnH</i> (R)         | psb A       | CGAAGCTCCATCTACAAATGG         | Hamilton (1999)                 |
|                                         | trn H (GUG) | ACTGCCTTGATCCACTTGGC          | Hamilton (1999)                 |
|                                         | MYpsb A 1   | TTTTGATTGCAAATAAAGGAGCAA      | this study                      |
| <i>trnL</i> -F<br>trnL (UAA)            | c B49317    | CGAAATCGGTAGACGCTACG          | Taberlet <i>et al.</i> (1991)   |
|                                         | d A49855    | GGGGATAGAGGGACTTGAAC          | Taberlet <i>et al.</i> (1991)   |
|                                         | e B49873    | GGTTCAAGTCCCTCTATCCC          | Taberlet <i>et al.</i> (1991)   |
| trnF (GAA)                              | f A50272    | ATTTGAACTGGTGACACGAG          | Taberlet <i>et al.</i> (1991)   |
| <i>ndhF</i>                             | 1252f       | GATGAAATMTTAATGATAGTTGGT      | Biffin <i>et al.</i> (2006)     |
|                                         | 2063r       | CATTTGGAATTCCATCAATTA         | Biffin <i>et al.</i> (2006)     |

**Biffin, E., Craven, L.A., Crisp, M.D., & Gadek, P.A. 2006.** Molecular Systematics of *Syzygium* and Allied Genera (Myrtaceae): Evidence from the Chloroplast Genome. *Taxon* **55**: 79-94.

**Hamilton, M.B. 1999.** Four primer pairs for the amplification of chloroplast intergenic regions with intraspecific variation. *Molecular Ecology* **8**: 521-523

**Murillo-A, J., Ruiz-P, E., Landrum, L.R., Stuessy, T.F., & Barfuss, M.H.J. 2012.** Phylogenetic relationships in *Myrceugenia* (Myrtaceae) based on plastid and nuclear DNA sequences. *Molecular Phylogenetics and Evolution* **62**: 764-776.

**Sun, Y., Skinner, D., Liang, G., & Hulbert, S. 1994.** Phylogenetic analysis of *Sorghum* and related taxa using internal transcribed spacers of nuclear ribosomal DNA. *Theoretical and Applied Genetics* **89**: 26-32.

**Taberlet, P., Gielly, L., Pautou, G., & Bouvet, J. 1991.** Universal primers for amplification of three non-coding regions of chloroplast DNA. *Plant molecular biology* **17**: 1105-1109.

**White, T.J., Bruns, T., Lee, S., & Taylor, J. 1990.** Amplification and direct sequencing of fungal ribosomal RNA genes for phylogenetics. *PCR protocols: a guide to methods and applications* **18**: 315-322.

**Table S2.** PCR conditions

| Molecular Marker                | Reaction            | Conditions                                                                                                          |
|---------------------------------|---------------------|---------------------------------------------------------------------------------------------------------------------|
| ITS                             | AB101 - AB102       | 5 min at 94°C followed by 28 cycles of 1 min at 94°C, 1 min at 48°C, 1 min at 72°C and a last stage of 7 min 72°C   |
|                                 | AB101 - ITS 2       |                                                                                                                     |
|                                 | ITS 3 - AB102       | 4 min at 94°C followed by 30 cycles of 1 min at 94°C, 1 min at 49°C, 1.5 min at 72°C and a last stage of 4 min 72°C |
|                                 | ITS 2 - ITS 5       |                                                                                                                     |
|                                 | ITS 3 - ITS 4       |                                                                                                                     |
| <i>psbA</i> (F) <i>trnH</i> (R) | psb A - trn H       | 5 min at 94°C followed by 28 cycles of 1 min at 94°C, 1min at 48°C, 1 min at 72°C and a last stage of 7 min 72°C    |
| <i>trnL-F</i>                   | c - f               | 5 min at 94°C followed by 32 cycles of 1 min at 94°C, 1min at 48°C, 1 min at 72°C and a last stage of 7 min 72°C    |
|                                 | c - d               | 2 min at 94°C followed by 30 cycles of 1 min at 94°C, 1min at 50°C, 1 min at 72°C and a last stage of 4 min 72°C    |
|                                 | e - f               |                                                                                                                     |
| <i>ndhF</i>                     | 1252f-2063r         | 5 min at 80°C followed by 35 cycles of 1 min at 95°C, 1 min at 50°C, 5 min at 65°C and a last stage of 4 min 65°C   |
| <i>trnQ-5'</i> rpS16            | <i>trnQ</i> - rpS16 | 5 min at 80°C followed by 35 cycles of 1 min at 95°C, 1 min at 50°C, 5 min at 65°C and a last stage of 4 min 65°C   |
